# Supplementary material for: Consolidation chemotherapy may improve pathological complete response for locally advanced rectal cancer after neoadjuvant chemoradiotherapy: a retrospective study
Source: PeerJ. 2020 Jul 7;8:e9513. doi: 10.7717/peerj.9513 (PMC7350921; doi:10.7717/peerj.9513)
Supplement: Supplemental Information 1 [file peerj-08-9513-s001.xlsx]

## Sheet: 最终表格
case number	gender	age	BMI	ECOGPS	CEA	CEA class	cT	cN	cstage	group	nausea	fatigue	diarrhea	anal pain	urocystitis	poor appetite	bellyache	astriction	urinary tract infection	myalgia	septicemia	leukopenia	hand foot syndrome	neutropenia	anemia	thrombocytopenia	Pelvic infection	pulmonary infection	Grade 3 AE	Grade 1-2 AE	interval time	interval time class	operation method	ypT	ypN	ypstage	pCR	DS	laparoscope	blood loss	ileus	incisional pain	Surgical infection	anastomotic fistula	uroclepsia	pneumonia	perineum infection	Intra-abdominal infection	enteritis
188050	1	65	18.36	0	4.94	1	4	0	2	1	0	0	0	1	0	0	0	0	0	0	0	0	0	0	0	0	0	0	1	1	3	1	miles	4	0	2	0	0	0	0	0	0	1	0	0	0	0	0	0
189459	2	43	26.56	0	23.69	2	4	1	3	1	0	0	0	0	0	0	0	0	0	0	0	0	0	0	0	0	1	0	0	1	6	2	miles	4	0	2	0	0	0	100	0	0	0	0	0	0	0	0	0
189730	1	55	28.01	1	2.05	1	3	0	2	1	0	0	0	0	0	0	0	0	0	0	0	0	0	0	0	0	0	0	0	1	5	1	miles	4	0	2	0	0	0	200	0	0	1	0	0	0	0	0	0
198685	1	49	22.7	1	1.06	1	4	2	3	1	1	0	1	0	0	1	0	1	0	0	0	1	0	1	1	0	1	0	0	1	4	1	miles	4	2	3	0	0	0	100	0	0	0	0	0	0	0	0	0
199439	1	25	29.36	0	2.24	1	3	0	2	1	0	0	0	0	0	0	0	0	0	0	0	0	0	0	0	0	0	0	0	1	4	1	Dixon	0	0	0	1	1	0	50	0	0	0	0	0	0	0	0	0
271524	2	46	21.9	1	5.43	2	3	1	3	1	0	0	0	0	0	0	1	0	0	0	0	0	0	1	0	0	0	1	0	1	6	2	Dixon	4	0	2	0	0	0	0	0	0	0	0	0	0	0	0	0
279117	1	47	20.68	1	2.89	1	3	1	3	1	1	0	0	0	0	1	1	0	0	0	0	1	0	0	0	0	1	0	0	1	3	1	Dixon	4	1	3	0	0	1	50	0	1	0	0	0	0	0	0	0
385958	1	61	19.47	0	3.23	1	3	0	2	1	0	0	0	0	0	0	0	0	0	0	0	0	0	0	0	0	0	0	0	1	6	2	miles	4	0	2	0	0	1	100	0	0	0	0	0	0	0	0	0
386119	1	44	26.06	0	6.93	2	4	0	2	1	0	0	0	0	0	0	0	0	0	0	0	1	0	0	0	0	0	0	0	1	5	1	Hartmann	2	0	1	0	1	0	0	0	0	0	0	0	0	0	0	0
386893	2	34	23.44	0	96.88	2	4	1	3	1	0	0	0	0	0	0	0	0	0	0	0	0	0	0	0	0	0	0	0	1	6	2	miles	4	0	2	0	0	0	100	0	0	1	0	0	0	0	0	0
422610	1	60	23.57	0	5.68	2	3	0	2	1	1	0	0	0	0	0	1	0	0	0	0	0	0	1	0	0	0	0	0	1	6	2	Hartmann	1	0	1	0	1	0	50	0	0	0	0	0	0	0	0	0
478284	1	61	27.94	1	2.15	1	3	0	2	1	0	0	0	0	0	0	0	0	0	0	0	0	0	0	0	0	0	0	0	1	6	2	Dixon	2	0	1	0	1	1	50	0	1	1	0	0	0	0	0	0
499356	2	69	28.89	0	7.77	2	4	2	3	1	0	0	0	0	0	0	0	0	0	0	0	1	0	0	0	0	0	0	0	1	6	2	Dixon	4	1	3	0	0	0	100	0	0	0	0	0	0	0	0	0
503995	1	62	22.67	0	2.79	1	3	1	3	1	0	0	0	0	0	0	0	0	0	0	0	0	0	0	0	0	0	0	0	1	11	3	Dixon	2	0	1	0	1	0	20	0	0	0	0	0	0	0	0	0
504550	1	76	22.65	1	11.4	2	4	2	3	1	0	0	0	0	0	0	0	0	0	0	0	0	0	0	0	0	0	0	0	1	9	2	Dixon	1	0	1	0	1	0	50	0	0	0	1	0	0	0	0	0
510490	1	57	21.47	1	5.69	2	3	1	3	1	0	0	0	0	0	0	0	0	0	0	0	0	0	0	0	0	0	0	0	1	12	3	Dixon	4	0	2	0	0	0	30	0	0	0	0	0	0	0	0	0
511059	2	42	20.31	1	37.98	2	4	1	3	1	0	0	0	1	0	0	0	1	0	0	0	1	0	0	0	0	0	0	0	1	7	2	miles	4	2	3	0	0	0	60	0	1	1	0	0	0	0	0	0
522632	1	76	23.66	0	6.92	2	4	1	3	1	0	0	0	0	0	0	0	0	0	0	0	1	0	0	0	0	0	0	0	1	13	3	miles	2	0	1	0	1	0	100	0	0	0	0	0	0	0	0	0
524022	1	76	22.98	0	15.66	2	3	1	3	1	0	0	0	0	1	0	0	0	0	0	0	0	0	0	0	0	0	0	0	1	8	2	Dixon	4	0	2	0	0	0	50	0	1	0	0	0	0	0	0	0
530202	2	46	21.98	0	6.06	2	3	1	3	1	0	0	0	1	0	0	0	0	0	0	0	0	0	0	0	0	0	0	0	1	6	2	miles	3	0	2	0	0	1	30	0	0	0	0	0	0	0	0	0
179358	1	49	28.34	1	28.93	2	4	1	3	1	0	0	0	0	0	0	0	0	1	0	0	1	0	1	0	0	0	0	0	1	6	2	miles	4	0	2	0	0	0	0	0	0	0	0	0	0	1	0	0
193276	2	48	26.67	1	2.67	1	4	1	3	1	0	0	0	0	0	0	0	0	0	0	0	0	0	0	0	0	0	0	0	1	5	1	miles	4	0	2	0	0	0	0	0	0	0	0	0	0	0	0	0
350890	2	64	28.51	0	3.69	1	3	1	3	1	0	0	1	0	0	0	0	0	0	0	0	1	0	1	0	0	0	0	0	1	4	1	Dixon	2	0	1	0	1	0	100	0	1	0	0	0	0	0	1	0
385343	1	55	24.77	0	152.2	2	4	2	3	1	0	0	1	0	0	0	0	0	0	0	0	0	0	0	0	0	0	0	0	1	8	2	Hartmann	4	3	3	0	0	0	50	0	0	0	0	0	0	0	0	0
425712	1	61	25.88	1	3.58	1	4	1	3	1	0	0	0	0	0	0	0	0	0	0	0	0	0	0	0	0	0	0	0	1	5	1	Dixon	4	0	2	0	0	1	40	0	1	0	0	0	0	0	0	0
427275	2	33	29.29	0	8.01	2	4	1	3	1	0	0	0	1	0	0	0	0	0	0	0	1	0	0	0	0	0	0	0	1	8	2	Dixon	1	0	1	0	1	0	50	0	0	0	0	0	0	0	0	0
515604	1	53	17.92	1	111.8	2	4	2	3	1	0	0	0	0	0	0	0	0	0	0	0	0	0	0	0	0	0	0	0	1	6	2	miles	4	0	2	0	0	0	50	0	0	0	0	0	0	0	0	0
522343	2	48	24.56	0	2.07	1	4	1	3	1	0	0	0	0	0	0	0	0	0	0	0	0	0	0	0	0	0	0	0	1	3	1	Dixon	3	1	3	0	0	0	0	0	0	0	0	0	0	0	0	0
192548	2	57	21.5	0	6.53	2	4	0	2	1	0	0	0	0	0	0	0	0	0	0	0	0	0	0	0	0	0	0	0	1	5	1	miles	4	0	2	0	0	0	40	0	0	0	0	0	0	0	0	0
201142	1	51	26.4	1	16.77	2	4	1	3	1	0	0	0	0	0	1	0	0	0	0	0	0	0	0	0	0	0	0	0	1	3	1	Dixon	2	0	1	0	1	0	100	0	0	0	0	0	0	0	0	0
348370	2	72	25.39	0	18.32	2	4	2	3	1	0	0	0	0	0	0	0	0	0	1	0	0	0	0	0	0	0	0	0	1	14	3	Hartmann	4	2	3	0	0	0	0	0	0	0	0	0	0	0	0	0
351290	2	24	17.36	1	1.85	1	4	0	2	1	1	0	0	0	0	0	1	0	0	0	0	0	0	0	0	0	0	0	0	1	8	2	Hartmann	4	1	3	0	0	0	50	0	1	1	0	0	0	0	0	0
367322	2	67	20.82	1	1.19	1	4	1	3	1	0	1	0	0	0	0	0	0	0	0	0	0	0	0	0	0	0	0	0	1	6	2	Hartmann	4	0	2	0	0	0	100	0	0	0	0	0	0	1	0	0
367601	2	49	23.11	0	4.32	1	3	1	3	1	0	0	0	0	0	0	0	0	0	0	0	0	0	0	0	0	0	0	0	1	3	1	miles	2	0	1	0	1	0	30	0	0	0	0	0	0	0	0	0
401401	2	68	30.47	1	7.45	2	4	1	3	1	0	0	1	0	0	0	0	0	0	0	0	0	0	0	0	0	0	0	0	1	3	1	Dixon	4	1	3	0	0	0	0	0	0	0	0	0	0	0	1	0
402500	1	64	21.8	1	1.6	1	4	1	3	1	0	0	0	0	0	0	0	0	0	0	0	0	0	0	0	0	0	0	0	1	4	1	Dixon	4	0	2	0	0	0	40	0	0	0	0	0	0	0	0	0
402709	2	75	21.49	1	5.59	2	4	1	3	1	0	0	0	0	0	1	0	0	0	0	0	0	0	0	0	0	0	0	0	1	6	2	Dixon	3	0	2	0	0	1	30	0	0	0	0	0	0	0	0	0
420605	1	73	22.65	1	3.15	1	4	1	3	1	0	0	0	0	0	0	0	0	0	0	0	0	0	0	0	0	0	0	0	1	3	1	miles	2	1	3	0	0	0	50	0	0	1	0	0	0	0	0	0
424853	2	78	23.14	0	1.78	1	4	0	2	1	0	0	0	0	0	0	0	0	0	0	0	0	0	0	0	0	0	0	0	1	4	1	Dixon	4	0	2	0	0	0	50	0	1	0	0	0	0	0	0	0
426024	1	65	23.72	0	14.11	2	4	1	3	1	0	0	0	0	0	0	0	0	0	0	0	0	0	0	0	0	0	0	0	1	3	1	miles	4	1	3	0	0	0	20	0	0	0	0	0	0	0	0	0
434448	2	70	27.64	1	6.53	2	4	1	3	1	0	0	0	0	0	0	0	0	0	0	0	0	0	0	0	0	0	0	0	1	3	1	Dixon	4	1	3	0	0	0	40	0	0	0	0	0	0	0	0	0
473109	2	30	19.9	0	2.88	1	4	2	3	1	0	0	0	0	0	0	0	0	0	0	0	0	0	0	0	0	0	0	0	1	4	1	Hartmann	4	2	3	0	0	1	50	0	0	0	0	0	0	0	1	0
478220	1	72	27.33	0	1.55	1	3	2	3	1	1	0	0	0	0	1	0	0	0	0	0	0	0	0	0	0	0	0	0	1	4	1	Dixon	4	1	3	0	0	1	0	0	0	0	0	0	0	0	0	0
479168	1	65	24.17	1	24.3	2	4	1	3	1	0	0	0	0	0	0	0	0	0	0	0	0	0	0	0	0	0	0	0	1	8	2	Dixon	4	0	2	0	0	0	100	0	0	0	0	0	0	0	0	0
500467	2	49	25	0	2.16	1	4	2	3	1	0	0	0	0	0	0	0	0	0	0	0	0	0	0	0	0	0	0	0	1	4	1	Dixon	2	1	3	0	0	1	0	0	1	0	0	0	0	0	0	0
501340	2	30	22.65	1	0.93	1	4	1	3	1	0	0	0	0	0	0	0	0	0	0	0	0	0	0	0	0	0	0	0	1	5	1	miles	4	0	2	0	0	1	30	0	0	0	0	0	0	0	0	0
503715	1	37	20.6	1	77.45	2	4	1	3	1	0	0	0	0	0	0	0	0	0	0	0	0	0	0	0	0	0	0	0	1	4	1	Dixon	4	0	2	0	0	0	0	0	0	0	0	0	1	0	0	0
504645	1	63	25	1	1.88	1	4	1	3	1	0	0	0	0	0	0	0	0	0	0	0	0	0	0	0	0	0	0	0	1	4	1	Dixon	2	0	1	0	1	0	50	0	0	0	1	0	0	0	0	0
506720	1	44	20.76	1	37.22	2	4	1	3	1	0	0	1	0	0	0	0	0	0	0	0	0	0	0	0	0	0	0	0	1	3	1	Hartmann	4	0	2	0	0	0	100	0	0	0	0	0	0	0	0	0
509012	2	51	24.84	0	7.6	2	4	2	3	1	1	0	0	0	0	1	0	0	0	0	0	0	0	0	0	0	0	0	0	1	3	1	Hartmann	4	2	3	0	0	1	0	0	0	0	0	0	0	0	0	0
514908	2	55	23.72	1	3.93	1	4	1	3	1	0	0	0	0	0	0	0	0	0	0	0	0	0	0	0	0	0	0	0	1	6	2	miles	4	2	3	0	0	1	50	0	0	1	0	0	0	0	0	0
522415	1	44	20.76	0	4.04	1	4	2	3	1	0	0	0	0	0	0	1	0	0	0	0	0	0	0	0	0	0	0	0	1	5	1	Dixon	4	0	2	0	0	0	50	0	1	1	1	0	0	0	0	0
522703	1	59	18.94	1	2.45	1	4	1	3	1	0	0	0	0	0	0	0	0	0	0	0	0	0	0	1	0	0	0	0	1	5	1	Dixon	4	1	3	0	0	0	0	0	0	0	0	0	0	0	0	0
522717	1	68	28.08	1	2.87	1	3	1	3	1	0	0	0	0	0	0	0	0	0	0	0	0	0	0	0	0	0	0	0	1	5	1	Dixon	3	0	2	0	0	1	0	0	0	0	0	0	0	0	0	0
522752	2	47	29.96	1	4.58	1	4	0	2	1	0	0	0	0	0	0	0	0	0	0	0	0	0	0	0	0	0	0	0	1	5	1	Dixon	0	0	0	1	1	0	20	0	0	0	0	0	0	0	0	0
525791	1	56	22.14	1	67.01	2	4	1	3	1	0	0	0	0	0	0	0	0	0	0	0	0	0	0	0	0	0	0	0	1	7	2	Dixon	2	0	1	0	1	1	0	0	0	0	0	0	0	0	0	0
526730	2	58	19.14	1	2.06	1	3	1	3	1	0	0	0	0	0	0	0	0	0	0	0	0	0	1	0	0	0	0	0	1	11	3	Dixon	0	0	0	1	1	1	100	0	0	0	0	0	0	0	0	0
527413	1	57	23.31	0	1.86	1	4	1	3	1	0	0	0	0	0	0	0	0	0	0	0	0	0	0	0	0	0	0	0	0	5	1	Dixon	4	2	3	0	0	1	30	0	0	0	0	0	0	0	0	0
530217	2	66	23.87	1	3.71	1	4	1	3	1	0	0	0	0	0	0	0	0	0	0	0	0	0	0	0	0	0	0	0	0	6	2	miles	4	2	3	0	0	0	100	0	0	0	0	0	0	0	0	0
531386	1	56	28.02	0	3.63	1	3	1	3	1	0	0	0	0	0	0	0	0	0	0	0	0	0	0	0	0	0	0	0	0	5	1	miles	3	1	3	0	0	1	0	0	0	0	0	0	0	0	0	0
533933	1	44	26.12	1	2.2	1	4	0	2	1	0	0	0	0	0	1	0	0	0	0	0	0	0	0	0	0	0	0	0	0	5	1	Hartmann	4	0	2	0	0	1	0	0	0	0	0	0	0	0	0	0
201643	1	51	26.96	1	1.39	1	4	2	3	2	0	0	0	0	0	0	0	0	0	0	0	0	0	0	0	0	0	0	1	1	9	2	miles	2	0	1	0	1	0	100	0	0	0	0	0	0	0	0	0
203760	2	43	29.4	1	1.37	1	4	1	3	2	1	0	0	0	0	0	0	0	0	0	0	0	0	0	0	0	0	0	1	1	10	2	miles	4	0	2	0	0	0	0	0	0	0	0	0	0	0	0	0
204331	1	27	23.9	1	55.22	2	4	2	3	2	0	0	0	1	0	0	0	0	0	0	0	0	0	0	0	0	0	0	0	1	8	2	Dixon	4	1	3	0	0	0	150	0	0	0	0	0	0	0	0	0
271199	2	45	24.1	0	1.68	1	4	0	2	2	1	0	1	0	0	0	0	0	0	0	0	0	0	1	0	0	0	0	0	1	4	1	Dixon	4	2	3	0	0	0	100	0	1	0	0	0	0	0	0	0
368451	1	55	22.5	0	141.2	2	4	0	2	2	1	0	0	0	0	0	0	1	0	0	0	0	0	0	1	0	0	0	0	1	10	2	miles	2	0	1	0	1	0	50	0	1	0	0	0	0	0	0	1
368699	1	53	23.88	1	2.35	1	4	1	3	2	1	0	0	0	0	1	0	0	0	0	0	1	0	0	0	0	0	0	0	1	6	2	Hartmann	2	0	1	0	1	0	200	0	1	1	0	0	0	0	0	0
401895	1	54	26.06	0	0.94	1	4	1	3	2	0	0	1	0	0	0	0	0	0	0	0	0	0	0	0	0	0	0	0	1	6	2	Hartmann	3	0	2	0	0	1	50	0	0	0	0	0	0	0	0	0
420960	1	31	26.29	0	1.37	1	3	2	3	2	0	0	0	1	0	0	0	0	0	0	0	0	0	0	0	0	0	0	0	1	9	2	miles	2	0	1	0	1	0	50	0	0	0	0	0	0	0	0	0
423893	1	47	24.22	1	3.4	1	4	0	2	2	0	0	0	0	0	0	0	0	0	0	0	0	0	0	0	0	0	0	0	1	10	2	miles	2	0	1	0	1	0	100	0	0	0	0	0	0	0	0	0
428241	2	52	23.14	1	2.68	1	4	2	3	2	1	0	0	0	0	0	0	0	0	0	0	1	0	1	0	0	0	0	0	1	13	3	miles	2	2	3	0	0	0	50	0	0	0	0	0	0	0	0	0
431463	1	46	25.31	0	5.59	2	3	1	3	2	0	0	1	0	0	0	0	0	0	0	0	0	0	0	0	0	0	0	0	1	11	3	miles	2	0	1	0	1	0	30	0	0	0	0	0	1	0	0	0
475906	2	51	26.44	0	0.24	1	4	2	3	2	0	0	0	1	0	0	0	0	0	0	0	0	0	1	0	0	0	0	0	1	12	3	Dixon	0	0	0	1	1	1	50	0	1	0	0	0	0	0	0	0
478263	2	32	23.74	0	0.68	1	3	1	3	2	0	0	0	0	0	0	0	0	0	0	0	1	0	0	0	0	0	0	0	1	7	2	miles	2	0	1	0	1	0	40	0	0	0	0	0	0	1	0	0
478547	1	41	24.56	1	4.76	1	3	1	3	2	0	0	0	1	0	0	0	0	0	0	0	1	0	0	0	0	0	0	0	1	9	2	Dixon	2	0	1	0	1	1	100	0	0	0	0	0	0	0	0	0
499410	1	62	27.3	1	4.42	1	4	0	2	2	0	0	1	1	0	0	0	0	0	0	0	0	0	0	1	0	0	0	0	1	9	2	Dixon	4	0	2	0	0	0	30	0	0	0	0	0	0	0	0	0
502672	1	46	26.23	0	7.39	2	4	1	3	2	0	0	0	1	0	0	0	1	0	0	0	0	0	0	0	0	0	0	0	1	11	3	miles	3	0	2	0	0	1	50	0	1	0	0	0	0	0	1	0
502706	1	57	20.2	0	247.6	2	4	0	2	2	0	0	0	1	0	0	0	0	0	0	0	0	0	0	0	0	0	0	0	1	10	2	miles	4	0	2	0	0	0	100	0	0	0	0	0	0	0	0	0
503272	2	61	25.28	0	1.86	1	3	2	3	2	0	0	0	0	0	0	0	0	0	0	0	1	0	0	0	0	0	0	0	1	3	1	Dixon	3	0	2	0	0	1	100	0	0	0	0	0	0	0	0	0
504781	1	60	24.45	0	3.08	1	3	1	3	2	0	0	1	0	0	0	1	0	0	0	0	0	0	0	1	0	0	0	0	1	11	3	Dixon	3	0	2	0	0	1	50	0	1	0	0	0	0	0	0	0
505638	1	53	33.95	1	21.59	2	3	1	3	2	0	0	0	0	0	0	0	0	0	0	0	0	0	0	0	0	0	0	0	1	8	2	miles	4	0	2	0	0	0	40	0	0	0	0	0	0	0	0	0
505661	1	58	25.21	1	2.6	1	4	1	3	2	0	0	1	0	0	1	1	0	0	0	0	0	0	0	0	0	0	0	0	1	5	1	Dixon	1	1	2	0	0	0	30	0	0	0	0	0	0	0	1	0
506243	2	51	22.31	0	1.22	1	3	1	3	2	0	0	0	0	0	0	0	0	0	0	0	1	0	0	0	0	0	0	0	1	4	1	Dixon	3	0	2	0	0	0	50	0	0	0	0	0	0	0	0	0
507275	2	68	26.5	1	2.82	1	3	1	3	2	1	0	1	0	0	0	1	0	0	0	0	0	0	0	0	0	0	0	0	1	4	1	Dixon	4	0	2	0	0	1	500	0	1	0	0	0	0	0	0	0
508146	1	69	20.29	1	21.36	2	4	1	3	2	0	0	0	0	0	0	0	0	0	0	0	0	0	0	0	0	0	0	0	1	14	3	Dixon	2	0	1	0	1	0	30	0	0	0	0	0	0	0	0	0
510232	1	67	22.03	1	10.91	2	3	2	3	2	0	0	0	0	0	0	1	0	0	0	0	1	0	0	0	0	0	0	0	1	6	2	miles	2	0	1	0	1	0	100	0	0	0	0	0	1	0	1	0
510587	1	71	22.57	1	17.88	2	3	0	2	2	0	0	0	0	0	0	0	0	0	0	0	0	0	0	0	0	0	0	0	1	9	2	miles	0	0	0	1	1	1	50	0	0	0	0	0	0	0	0	0
514612	1	68	20.9	1	66.07	2	4	2	3	2	0	0	1	0	0	0	0	0	0	0	0	1	0	0	0	0	0	0	0	1	8	2	miles	2	0	1	0	1	1	40	0	1	0	0	0	0	0	0	0
515124	2	56	25.78	1	9.31	2	3	2	3	2	1	0	0	1	0	0	0	0	0	0	0	1	0	0	0	0	0	0	0	1	10	2	Dixon	4	0	2	0	0	0	50	0	0	0	0	0	1	0	0	0
515804	1	57	24.61	0	3.92	1	3	1	3	2	0	0	0	0	0	0	0	0	0	0	0	0	0	0	0	0	0	0	0	1	9	2	Dixon	3	0	2	0	0	0	30	0	0	0	0	0	0	0	1	0
516270	2	44	23.33	1	63.61	2	3	2	3	2	0	0	0	0	0	0	0	0	0	0	0	0	0	0	0	0	0	0	0	1	9	2	Hartmann	4	1	3	0	0	0	200	0	0	0	0	0	0	0	0	0
516497	1	65	19.03	1	10.59	2	4	2	3	2	0	0	0	0	0	0	0	0	0	0	0	0	0	0	0	0	0	0	0	1	11	3	miles	4	2	3	0	0	1	100	0	0	0	0	0	0	0	0	0
517780	2	64	22.03	0	22.76	2	4	2	3	2	1	0	0	0	0	0	0	0	0	0	0	0	1	0	0	0	0	0	0	1	16	3	miles	0	0	0	1	1	1	50	0	0	0	0	0	0	0	0	0
521045	1	53	22.49	1	0	0	4	0	2	2	0	0	0	0	0	0	0	0	0	0	0	0	0	0	0	0	0	0	0	1	11	3	miles	0	0	0	1	1	1	50	0	0	0	0	0	0	0	0	0
525779	1	62	28.41	1	13.92	1	3	0	2	2	0	0	0	0	0	0	0	0	0	0	0	0	0	0	0	0	0	0	0	1	11	3	miles	2	0	1	0	1	0	0	0	0	0	0	0	0	0	0	0
528979	1	56	25.04	1	3.53	1	2	1	3	2	0	0	0	1	1	0	0	0	0	0	0	0	0	0	0	0	0	0	0	1	9	2	Dixon	2	1	3	0	0	1	50	0	0	0	0	0	0	0	1	0
529470	2	65	22.04	1	2.97	1	3	1	3	2	0	0	0	0	0	0	0	0	0	0	0	0	0	0	0	0	0	0	0	1	11	3	miles	2	0	1	0	1	1	50	0	0	0	0	0	0	0	0	0
530638	1	64	22.49	1	22.49	2	3	0	2	2	0	0	1	0	0	0	0	0	0	0	0	0	0	0	0	0	0	0	0	1	10	3	miles	1	0	1	0	1	1	0	0	0	0	0	0	0	0	0	0
531888	1	60	25.86	1	19.74	2	3	1	3	2	0	0	0	0	0	0	0	0	0	0	0	0	0	0	0	0	0	0	0	1	8	2	Hartmann	3	1	3	0	0	0	100	0	0	0	0	0	0	0	0	0
532614	1	66	18.99	1	5.08	2	4	2	3	2	0	0	0	0	0	0	0	0	1	0	0	0	0	0	0	0	0	0	0	1	9	2	Hartmann	2	0	1	0	1	1	0	0	0	0	0	0	0	0	0	0
533386	2	67	25.39	0	1.8	1	3	1	3	2	0	0	1	0	0	0	0	0	0	0	0	1	0	0	0	0	0	0	0	1	10	2	Dixon	4	0	2	0	0	1	20	0	0	0	0	0	0	0	0	0
533712	1	39	25.3	1	0.81	1	3	1	3	2	0	0	0	0	0	0	0	0	0	0	0	0	0	0	0	0	0	0	0	1	11	3	Dixon	2	0	1	0	1	1	0	0	0	0	0	0	0	0	0	0
200923	1	55	23.39	1	1.99	1	4	1	3	2	0	0	1	0	0	0	1	0	0	0	0	0	0	0	0	0	0	0	0	1	7	2	miles	0	0	0	1	1	0	150	0	0	0	0	0	0	0	0	0
267621	1	59	29.4	0	11.79	2	4	1	3	2	1	0	1	0	0	1	0	0	0	0	0	0	0	0	0	0	0	0	0	1	3	1	miles	3	0	3	0	0	0	150	0	0	0	0	0	0	0	1	0
270783	1	64	26.3	1	8.35	2	4	1	3	2	1	0	0	0	0	0	0	0	0	0	0	0	0	0	0	0	1	0	0	1	5	1	miles	2	1	3	0	0	0	50	0	1	0	0	0	0	1	0	0
271659	1	51	27.8	0	8.57	2	3	2	3	2	1	0	0	0	0	0	0	0	0	0	0	0	0	0	0	0	1	0	0	1	6	2	Hartmann	2	2	3	0	0	0	0	0	0	1	0	0	0	1	0	0
274235	2	20	18.45	0	10.24	2	4	2	3	2	0	0	1	1	0	0	0	0	0	0	0	1	0	0	0	0	0	0	0	1	7	2	miles	4	0	2	0	0	0	200	0	1	1	0	0	0	0	0	0
275303	1	25	25.9	0	6.46	2	4	2	3	2	0	0	0	1	0	0	0	0	0	1	0	0	0	1	0	0	0	0	0	1	7	2	Dixon	4	2	3	0	0	0	50	0	0	0	0	0	0	1	0	0
422740	1	41	22.83	1	2.95	2	4	1	3	2	1	0	0	1	0	0	0	0	0	0	0	0	0	0	0	0	0	0	0	1	8	2	miles	2	0	1	0	1	0	0	0	0	0	0	0	0	0	0	0
424503	2	41	22.63	0	11.07	2	3	1	3	2	0	0	0	0	0	0	0	0	0	0	0	1	1	0	0	0	0	0	0	1	7	2	Dixon	2	0	1	0	0	1	20	0	0	0	0	0	0	0	0	0
424855	1	59	24.22	0	1.23	1	4	1	3	2	0	0	0	1	0	0	0	0	0	0	0	1	0	0	0	0	0	0	0	1	9	2	miles	2	0	1	0	1	0	0	0	1	0	0	0	0	0	0	0
426604	1	51	26.17	1	23.89	2	3	1	3	2	0	0	0	0	0	0	0	0	0	0	0	1	0	0	0	0	0	0	0	1	6	1	miles	4	0	2	0	0	1	30	0	0	0	0	0	0	0	0	0
429843	1	53	29.21	1	1.37	1	4	0	2	2	0	0	0	0	0	0	1	0	0	0	0	1	0	0	0	0	0	0	0	1	11	3	miles	4	0	2	0	0	1	40	0	0	0	0	0	0	0	0	0
473732	2	54	24.91	1	0.73	1	3	1	3	2	0	0	0	0	0	0	0	0	0	0	0	0	0	0	0	0	0	0	0	1	10	2	Dixon	4	0	2	0	0	0	20	0	0	1	0	0	0	0	0	0
478174	1	60	25.39	0	203.1	2	4	0	2	2	0	0	0	1	0	0	0	0	0	0	0	0	0	0	0	0	0	0	0	1	8	2	Dixon	4	0	2	0	0	0	50	0	0	0	0	0	0	0	0	0
500716	2	47	19.96	0	0.98	1	3	1	3	2	0	0	1	0	0	0	1	0	0	0	0	0	0	0	0	0	0	0	0	1	8	2	miles	0	0	0	1	1	1	0	0	0	0	0	0	0	0	0	0
501030	1	67	26.75	0	6.24	2	4	2	3	2	0	0	1	0	0	0	0	0	0	0	0	0	0	0	0	0	0	0	0	1	13	3	Dixon	4	0	2	0	0	1	50	0	1	0	0	0	0	0	1	0
502021	1	52	23.3	1	7.1	2	4	1	3	2	0	0	1	0	0	0	0	0	0	0	0	0	0	0	0	0	0	0	0	1	6	2	Hartmann	4	0	2	0	0	1	50	0	0	0	0	0	0	0	0	0
503999	2	51	29.55	0	9.25	2	4	1	3	2	1	0	0	0	0	0	1	0	0	0	0	0	0	0	0	0	0	0	0	1	6	2	Dixon	4	3	3	0	0	0	50	0	1	0	0	0	0	0	0	0
506761	2	50	21.3	0	41.25	2	4	1	3	2	1	0	0	0	0	0	0	0	0	0	0	1	0	1	0	0	0	0	0	1	6	2	Hartmann	4	0	2	0	0	0	0	0	1	0	0	0	0	0	0	0
509451	1	66	19.03	0	4.39	1	3	2	3	2	0	0	0	0	0	0	0	0	0	0	0	1	0	1	0	0	0	0	0	1	5	1	miles	2	0	1	0	0	0	100	0	0	0	0	0	0	0	0	0
509617	1	51	23.66	1	11.73	2	4	1	3	2	0	0	0	1	0	0	0	1	0	0	0	0	0	0	0	0	0	0	0	1	10	2	Dixon	4	0	2	0	0	1	30	0	0	0	0	0	0	0	0	0
510303	1	27	23.99	1	76.45	2	4	2	3	2	0	0	0	1	0	0	0	0	0	0	0	0	0	0	0	0	0	0	0	1	10	2	Dixon	0	0	0	1	1	0	30	0	0	0	0	0	0	0	0	0
510509	1	55	28.68	0	9.46	2	4	1	3	2	0	0	0	0	0	0	0	0	0	0	0	0	0	0	0	0	0	0	0	1	11	3	Dixon	4	0	2	0	0	1	50	0	0	0	0	0	0	0	0	0
510638	2	57	27.18	0	2.25	1	4	1	3	2	0	0	0	0	0	1	0	0	0	0	0	1	0	0	0	0	0	0	0	1	12	3	miles	0	0	0	1	1	1	0	0	0	0	0	0	0	1	0	0
511591	1	72	21.3	1	1.83	1	4	1	3	2	0	0	0	0	0	0	0	0	0	0	0	1	0	0	0	0	0	0	0	1	10	2	Hartmann	4	0	2	0	0	0	50	0	0	0	0	0	0	0	0	0
511671	1	67	23.87	0	13.87	2	4	1	3	2	0	0	0	0	0	0	0	0	0	0	0	1	0	1	0	0	0	0	0	1	9	2	miles	3	0	2	0	0	1	0	0	0	0	0	0	0	0	0	0
514466	1	51	23.81	1	32.28	2	4	2	3	2	0	0	0	0	0	0	0	0	0	0	0	0	0	0	0	0	0	0	0	1	14	3	miles	2	1	3	0	0	0	0	0	1	0	0	0	0	0	0	0
514981	1	67	24.22	0	5.75	2	3	1	3	2	0	0	1	0	0	0	0	0	0	0	0	1	0	0	0	0	0	0	0	1	2	1	Dixon	2	0	1	0	0	1	20	0	0	0	0	0	0	0	0	0
517132	1	36	25.53	1	12.92	2	4	1	3	2	0	0	0	0	0	0	0	0	0	0	0	1	0	0	0	0	0	0	0	1	8	2	miles	0	0	0	1	1	1	0	0	1	0	0	0	0	0	0	0
517350	2	47	30.85	0	28.2	2	4	2	3	2	0	0	0	0	0	0	0	0	0	0	0	0	0	0	0	0	0	0	0	1	12	3	miles	2	0	1	0	1	1	200	0	0	0	0	0	0	1	0	0
519825	1	29	21.6	0	10.25	2	4	1	3	2	0	0	0	0	0	1	0	0	0	0	0	1	0	0	0	0	0	0	0	1	7	2	Dixon	0	0	0	1	1	0	0	0	0	0	0	0	0	1	0	0
520754	1	52	25.98	1	0	0	4	1	3	2	0	0	0	0	0	0	0	0	0	0	0	1	0	1	0	0	0	0	0	1	10	2	miles	3	0	2	0	0	1	50	0	0	0	0	0	0	1	0	0
522207	1	61	26.22	1	2.31	1	3	1	3	2	0	0	1	1	0	0	0	0	0	0	0	0	0	0	0	0	0	0	0	1	7	2	miles	0	0	0	1	1	1	0	0	0	0	0	0	0	0	0	0
522471	1	62	22.49	0	17.02	2	3	1	3	2	0	0	0	0	0	0	0	0	0	0	0	1	0	1	0	0	0	0	0	1	10	2	Dixon	2	1	3	0	0	1	150	0	0	0	1	0	0	0	0	0
522762	1	65	24.61	1	3.93	1	3	1	3	2	0	0	0	0	0	0	0	0	0	0	0	0	0	0	0	0	0	0	0	1	10	2	Dixon	2	0	1	0	1	1	100	0	1	0	0	0	0	0	0	0
523207	2	41	26.03	1	6.34	2	4	1	3	2	0	0	0	0	0	0	0	0	0	0	0	0	0	0	0	0	0	0	0	1	10	2	Dixon	0	0	0	1	1	1	50	0	0	0	0	0	0	0	0	0
528226	1	58	23.45	1	79.63	2	4	1	3	2	0	0	0	0	0	0	0	0	0	0	0	0	0	0	0	0	0	0	0	1	8	2	miles	0	0	0	1	1	0	100	0	0	0	0	0	0	0	0	0
528886	1	64	24.61	0	3.27	1	4	1	3	2	0	0	1	0	0	0	0	0	0	0	0	1	0	1	0	0	0	0	0	1	5	1	miles	2	0	1	0	1	1	50	0	0	0	0	0	0	0	0	0
529678	2	43	21.07	1	8.78	2	3	0	2	2	0	0	1	0	0	0	1	0	0	0	0	0	0	0	0	0	0	0	0	1	8	2	Dixon	0	0	0	1	1	0	0	0	1	0	0	0	0	0	0	0
529684	2	57	21.64	0	40.59	2	4	1	3	2	0	0	0	0	0	0	0	0	0	0	0	1	0	0	0	0	0	0	0	0	14	3	miles	0	0	0	1	1	1	0	0	0	1	0	0	0	0	0	0
533081	2	55	23.01	1	8.16	2	4	1	3	2	0	0	0	0	0	0	0	0	0	0	0	0	0	0	0	0	0	0	0	0	10	2	Dixon	3	0	2	0	0	1	50	0	0	0	0	0	0	0	0	0
534366	1	54	22.14	1	4.23	1	3	1	3	2	0	0	0	0	0	0	0	0	0	0	0	0	0	0	0	0	0	0	0	0	10	2	Dixon	1	0	1	0	1	0	0	0	0	0	0	0	0	0	0	0
535057	2	46	23.44	0	0.94	1	4	1	3	2	0	0	1	1	0	0	0	0	0	0	0	1	0	0	0	0	0	0	0	0	10	2	Dixon	0	0	0	1	1	1	30	0	0	1	0	0	0	0	0	0
[truncated: 2 more columns]
